# Supplementary material
Source: publisher site journal article supplement (https://www.dovepress.com/article/246503)
Supplement: Supplementary file 1 [file get_supplementary_file.php]

**Supplementary Figure 1.** This figure depicts the inputs that were selected from each one of the machine learning prediction models for the four different outcomes. Total number of features selected from each model as well as total number of times that each feature was selected are also calculated.

|  |  | **5-fold Cross Validation** | | | **Test Set** | | |
| --- | --- | --- | --- | --- | --- | --- | --- |
|  | **Number of Random Trees** | **Accuracy** | **Geometric Mean of Sensitivity-Specificity** | **MSE** | **Accuracy** | **Geometric Mean of Sensitivity-Specificity** | **MSE** |
| **Total Drugs Change** | **100** | **75%** | 61.44% | **0.832** | 76.38% | 66.68% | 0.622 |
| **250** | 75% | **62.54%** | 1.031 | 75.59% | 65.26% | 0.603 |
| **500** | 75% | 62.43% | 1.03 | 75.59% | 65.26% | 0.598 |
| **1000** | 75% | 61.74% | 1.03 | **75.59%** | **65.26%** | **0.597** |
| **Total Interference Change** | **100** | 79.76% | 50.17% | 3.902 | 81.89% | 54.88% | 3.365 |
| **250** | 81.15% | 52.28% | 3.891 | **83.46%** | **55.44%** | **3.308** |
| **500** | **81.35%** | **53.15%** | 3.864 | 82.67% | 55.16% | 3.353 |
| **1000** | 81.15% | 53.07% | **3.854** | 81.89% | 51.60% | 3.334 |
| **Total Severity Change** | **100** | 74.60% | **23.41%** | 3.274 | **74.80%** | **25.28%** | 3.617 |
| **250** | **74.80%** | 21.73% | **3.264** | 74.80% | 25.28% | 3.631 |
| **500** | 74.20% | 10.26% | 3.293 | 74.80% | 25.28% | **3.596** |
| **1000** | 74.80% | 19.87% | 3.282 | 74.80% | 25.28% | 3.601 |
| **Total Complaints Change** | **100** | 67.85% | 69.17% | 4.257 | **75.80%** | 25.28% | 3.617 |
| **250** | 67.66% | 68.96% | 4.326 | 67.71% | **69.14%** | **2.563** |
| **500** | 68.65% | 69.97% | 4.352 | 66.93% | 68.44% | 2.611 |
| **1000** | **69.04%** | **70.35%** | **4.33** | 67.71% | 69.14% | 2.588 |

**Supplementary Table 1.** Comparative results using different number of Random Trees for the Random Forest based predictors.


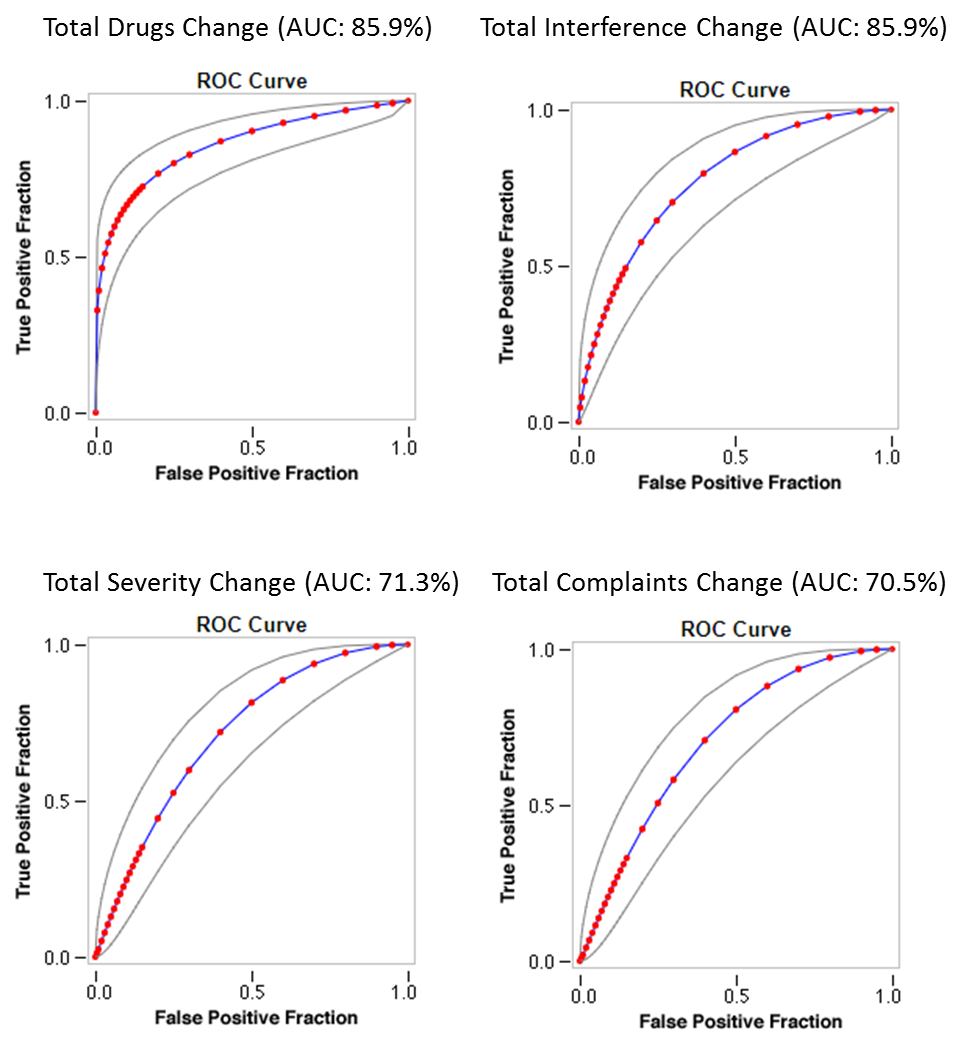


**Supplementary Figure 2.** Roc curve analysis on the test set using the best performing RF models from the cross validation exercise.
